# Supplementary material
Source: PubMed Central journal article supplement (PMC6312723)
Supplement: NIHMS956856-supplement-supplement_1.pdf [file NIHMS956856-supplement-supplement_1.pdf]

**Enhancing diversity in the hematology research workforce: A mentorship program to improve the odds of success for early stage investigators**

Betty S. Pace, MD<sup>1,2\*</sup>, Levi H. Makala, PhD, DVM<sup>1</sup>, Rita Sarkar, PhD<sup>3</sup>, Li Liu, PhD<sup>4</sup>, Mayuko Takezaki, MS<sup>1</sup>, Narla Mohandas, DSc<sup>5</sup>, Glorias Dixon, MS<sup>6</sup>, Ellen M. Werner, PhD<sup>3</sup>, Donna B. Jeffe, PhD<sup>7</sup>, Treva K. Rice, PhD<sup>8</sup>, Nita J. Maihle, PhD<sup>2</sup>, Juan González, PhD<sup>4</sup>

<sup>1</sup>Department of Pediatrics, Medical College of Georgia, Augusta University, Augusta, GA; <sup>2</sup>Department of Biochemistry and Molecular Biology, Medical College of Georgia, Augusta University, Augusta, GA; <sup>3</sup>Division of Blood Diseases and Resources, National Heart, Lung, and Blood Institute, National Institutes of Health, Bethesda, MD; <sup>4</sup>Department of Biological Sciences, University of Texas at Dallas, Richardson, TX; <sup>5</sup>New York Blood Center, New York, NY; <sup>6</sup>Planning Source, Inc., Dallas, TX; <sup>7</sup>Department of Medicine, Washington University School of Medicine, St. Louis, MO; <sup>8</sup>Division of Biostatistics, Washington University School of Medicine, St. Louis, MO

**SUPPLEMENTAL FILES**

## TABLES

| <b>Table 1S. Summary of mentees recruitment to SIPID and PRIDE programs.</b> |              |                |                |
|------------------------------------------------------------------------------|--------------|----------------|----------------|
|                                                                              | <b>SIPID</b> | <b>PRIDE 1</b> | <b>PRIDE 2</b> |
| <b>Cohort 1</b>                                                              | 9            |                |                |
| <b>Cohort 2</b>                                                              | 7            |                |                |
| <b>Cohort 3</b>                                                              | 9            |                |                |
| <b>Cohort 4</b>                                                              |              | 7              |                |
| <b>Cohort 5</b>                                                              |              | 8              |                |
| <b>Cohort 6</b>                                                              |              | 8              |                |
| <b>Cohort 7</b>                                                              |              |                | 10             |
| <b>Cohort 8</b>                                                              |              |                | 9              |
| <b>Cohort 9</b>                                                              |              |                | 9              |
| <b>Total</b>                                                                 | 25           | 23             | 28             |

| <b>Table 2S. Summary of hematology research focus FTG-PRIDE mentees grants and peer-reviewed publications.</b>                                                                                                                                                                                                                                                                                                                                                                                |                                                                                                                                                                                  |                                                                                        |              |
|-----------------------------------------------------------------------------------------------------------------------------------------------------------------------------------------------------------------------------------------------------------------------------------------------------------------------------------------------------------------------------------------------------------------------------------------------------------------------------------------------|----------------------------------------------------------------------------------------------------------------------------------------------------------------------------------|----------------------------------------------------------------------------------------|--------------|
|                                                                                                                                                                                                                                                                                                                                                                                                                                                                                               | <b>SIPID</b>                                                                                                                                                                     | <b>PRIDE 1</b>                                                                         | <b>Total</b> |
| <b>Total mentees</b>                                                                                                                                                                                                                                                                                                                                                                                                                                                                          | 18                                                                                                                                                                               | 16                                                                                     | 34           |
| <b>Number of mentees submitted extramural grant</b>                                                                                                                                                                                                                                                                                                                                                                                                                                           | 14                                                                                                                                                                               | 11                                                                                     | 25 (73.5%)   |
| <b>Number of mentees funded</b>                                                                                                                                                                                                                                                                                                                                                                                                                                                               | 10                                                                                                                                                                               | 6                                                                                      | 16           |
| <b>Grants/funded mentee</b>                                                                                                                                                                                                                                                                                                                                                                                                                                                                   | 1.9                                                                                                                                                                              | 1.5                                                                                    | 1.75         |
| <b>Types of NIH or Federal Grants</b>                                                                                                                                                                                                                                                                                                                                                                                                                                                         | 2 R01 (NHLBI); 1 R21 (NHLBI); 1 R21 (NINR); 1 R03 (NHLBI); 1 R03 (NIDDK); 4 K01 (NHLBI); 1 K01(NINR); 1 K07 (NHLBI); 1 K23 (NINR); 1 M01 (NCRR); 1 LRP (NHLBI); 3 (NSF); 1 (FDA) | 2 R01 (NICHD); 1 R01 (NIDDK); 1 R21 (FIC); 1 R34 (NHLBI); 3 K12 (NHLBI); 1 H13 (NCBDD) | 28           |
| <b>Total publications</b>                                                                                                                                                                                                                                                                                                                                                                                                                                                                     | 277                                                                                                                                                                              | 99                                                                                     | 376          |
| <b>Average publications</b>                                                                                                                                                                                                                                                                                                                                                                                                                                                                   | 15.4                                                                                                                                                                             | 6.2                                                                                    | 11.2         |
| <b>ABBREVIATIONS:</b> NHLBI, National Heart, Lung, and Blood Institute; NIDDK, National Institute of Diabetes and Digestive and Kidney Diseases; NINR, National Institute of Nursing Research; NCRR, National Center for Research Resources; NSF, National Science Foundation; FDA, US Food and Drug Administration; NICHD, National Institute of Child Health and Human Development; FIC, Fogarty International Center; NCBDD, National Center Birth Defects and Developmental Disabilities. |                                                                                                                                                                                  |                                                                                        |              |

## FIGURES

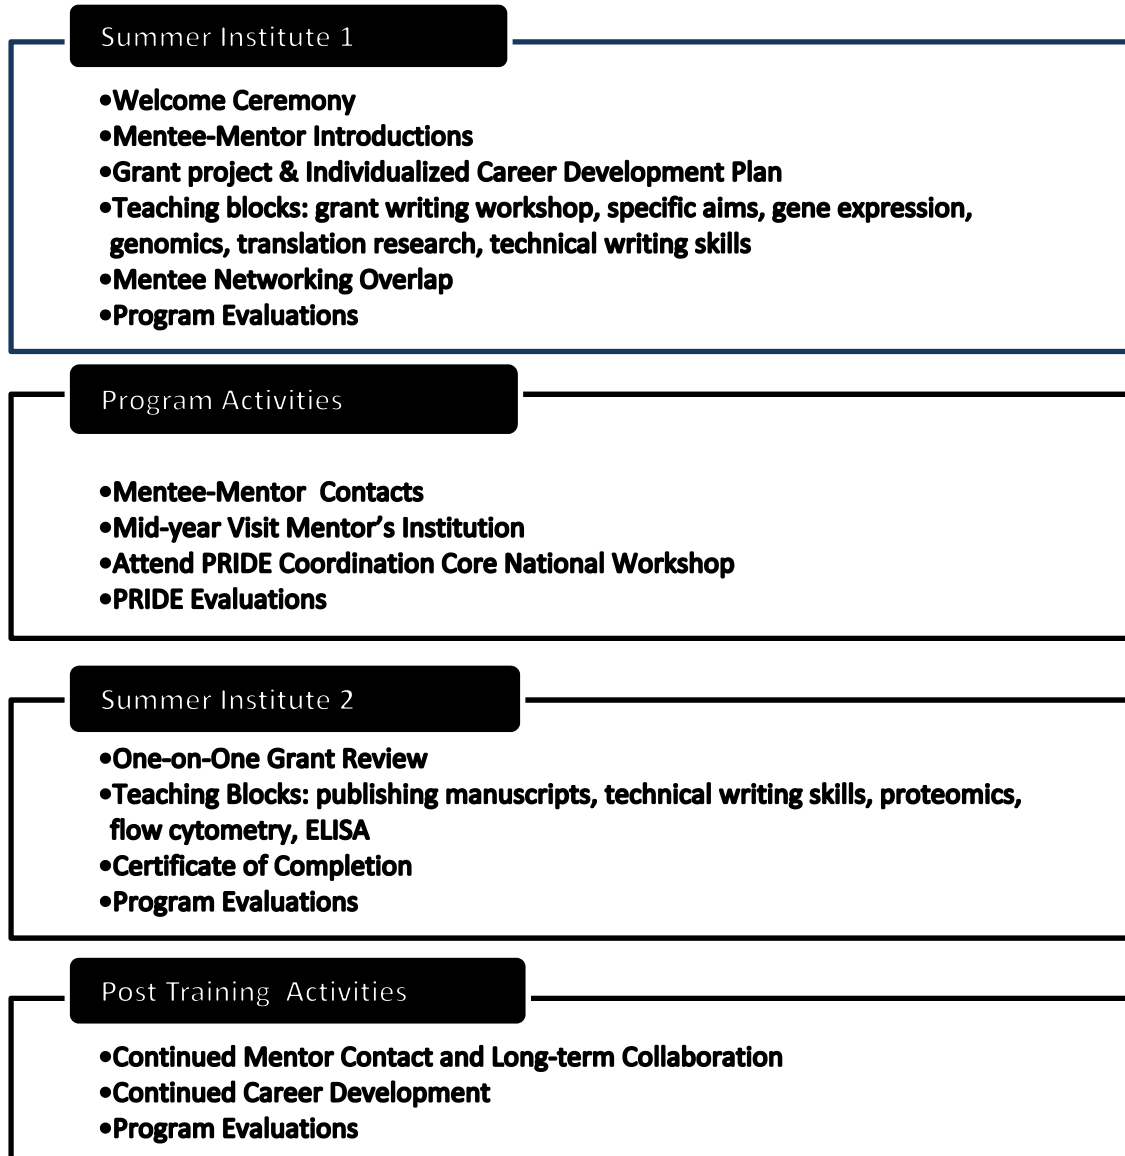

**Figure 1S. FTG-PRIDE Program Design.** Summarized are the major components of Summer Institute 1 and Summer Institute 2, program activities, didactic curriculum and other program requirements.

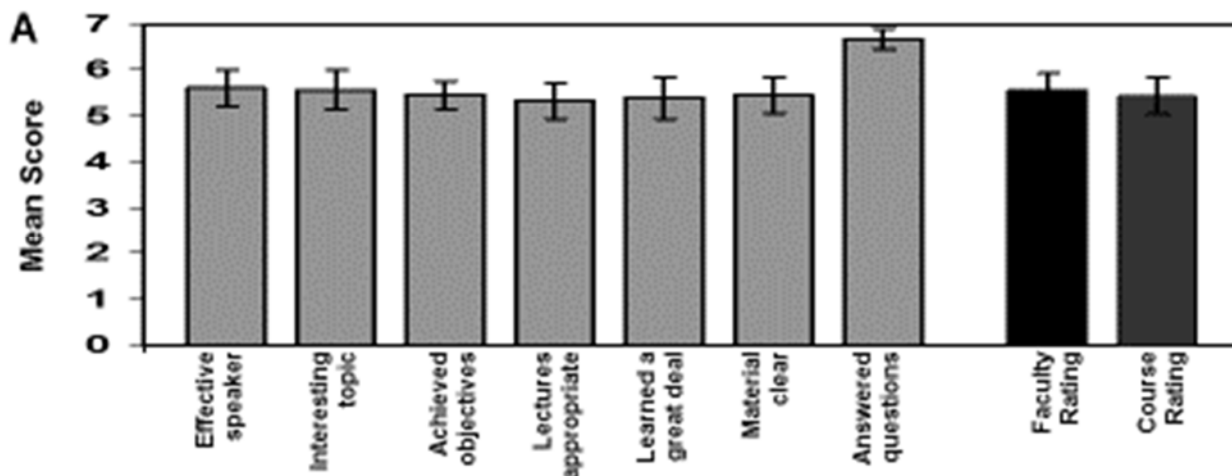

**Figure 2S. FTG-PRIDE Program evaluations establish program effectiveness. A)** Data were collected at the end of both Summer Institutes to assess the effectiveness of the curriculum and teaching faculty (gray bars) and overall PRIDE program ratings (black bars). Likert categorical scores range from 1 (strongly disagree) to 7 (strongly agree).

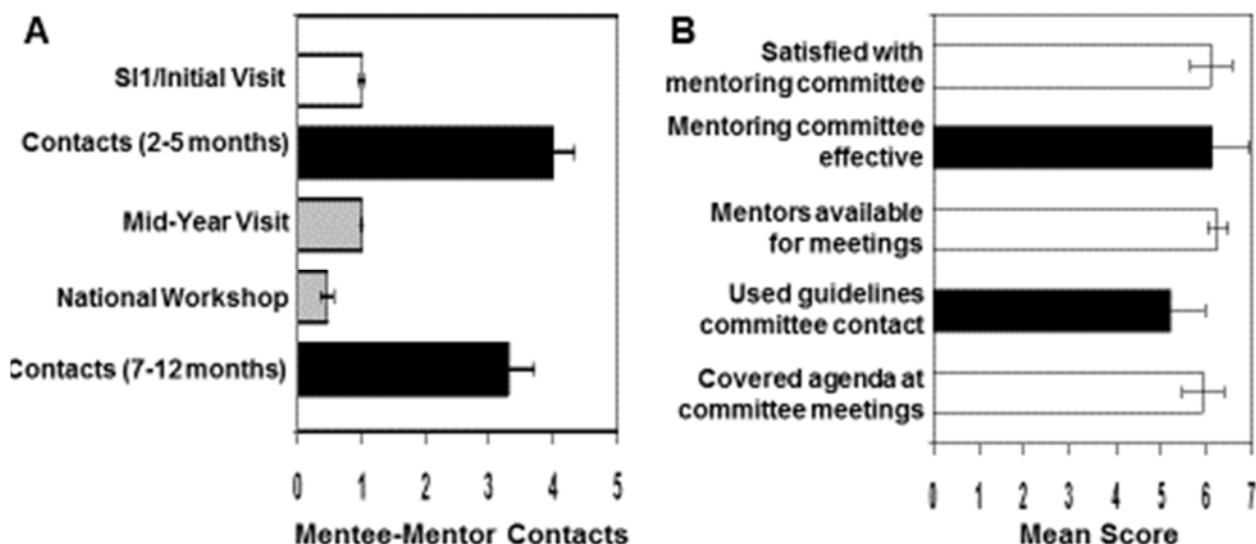

**Figure 3S. Summary of mentee-mentor contacts and mentoring committee evaluation. A)** Shown is the number of mentee-mentor contacts during the Summer Institute 1 (SI1) Welcome Ceremony or mentee visit to mentor's institution, mid-year face-to-face meetings and the PRIDE Coordination Core (PCC) National Workshop. The number of formal mentee-mentor contacts (per 6 month periods) made by phone and Skype were tracked by monthly progress reports submitted to the PRIDE office. During year 2 of training, mentee-mentor contacts continued on a monthly basis. **B)** After each Summer Institutes, evaluations were completed to determine the effectiveness of the mentoring committee using a 7-point Likert score ranging from 1 (strongly disagree) to 7 (strongly agree).
